# Supplementary material
Source: PubMed Central journal article supplement (PMC2805759)
Supplement: NIHMS158495-supplement-Supp_Fig_s1.pdf [file NIHMS158495-supplement-Supp_Fig_s1.pdf]

Fig. S1

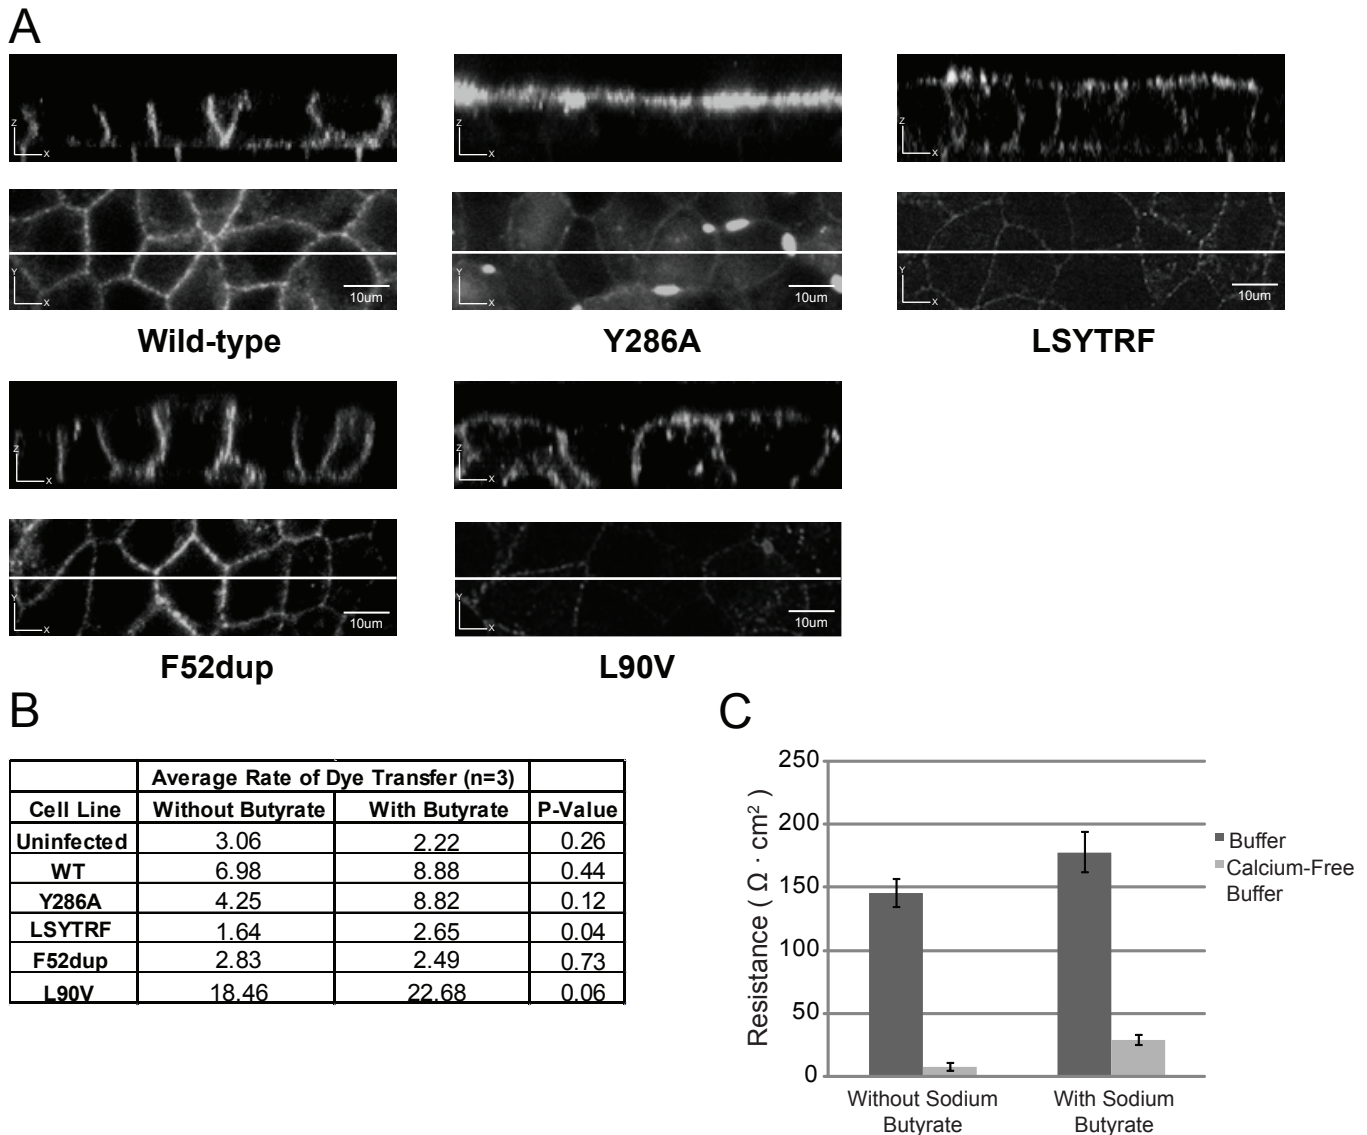

**Fig. S1. Sodium butyrate does not affect the polarized distribution of Cx43-eYFP constructs or the integrity of MDCK cell monolayers.** *A.* Confocal analysis performed without pre-incubation in 10 mM sodium butyrate showed the same qualitative apical/basolateral distribution of WT and mutant Cx43-eYFP constructs compared to results obtained with pre-incubation in 10 mM sodium butyrate. *B.* For most cell lines tested, paracellular dye flux assays showed no significant difference in rate of dye flux through polarized monolayers between cells pre-incubated in sodium butyrate and those that were not. *C.* Transepithelial resistance measurements were conducted on a cell line expressing the L90V mutant construct because its rate of paracellular dye flux was greater than the other cell lines. Results show no significant difference in transepithelial resistance between cells pre-incubated in sodium butyrate and those that were not. As a control, measurements conducted in calcium-free buffer show a significant decrease in resistance.
